# Supplementary material for: Metatranscriptomic Analysis Reveals Disordered Alterations in Oropharyngeal Microbiome during the Infection and Clearance Processes of SARS-CoV-2: A Warning for Secondary Infections
Source: MDPI journal article supplement (doi:10.3390/biom13010006), 2022-12-20
Supplement: s1 [file s1]

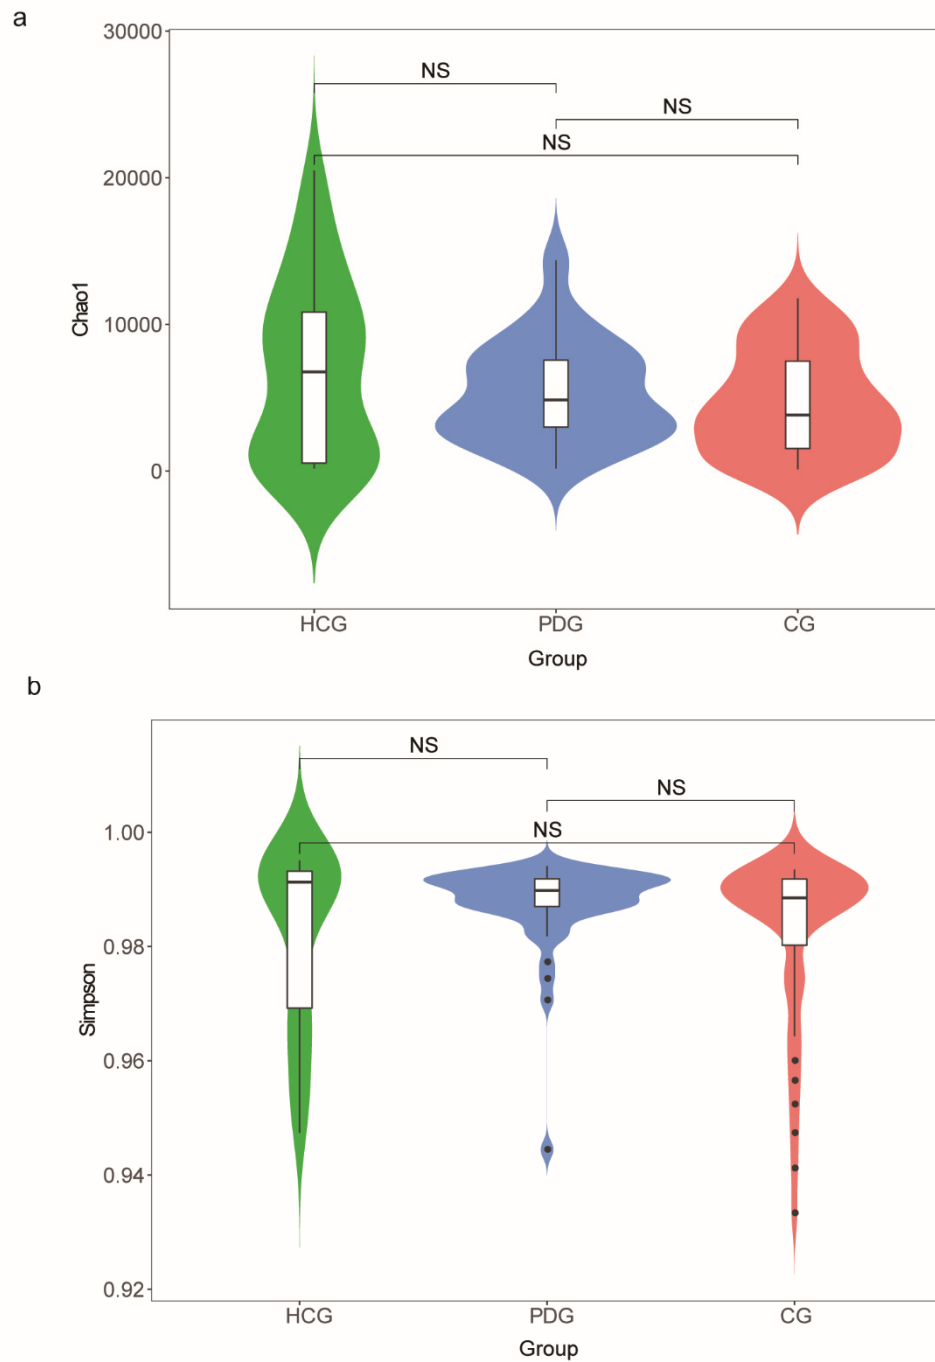

**Figure S1.** There were little changes in alpha diversity among PDG, CG and HCG, including **(a)** Chao1 index ( $P > 0.05$ ), **(b)** Simpson index ( $P > 0.05$ ).

**Table S1.** The *P*-values of bacteria among HCG, PDG and CG.

| <b>Genera</b>           | <b>HCG VS PDG</b> | <b>HCG VS CG</b> | <b>PDG VS CG</b> |
|-------------------------|-------------------|------------------|------------------|
| <i>Acetobacter</i>      | 0.5523845         | 0.08171029       | 0.0006542014     |
| <i>Actinomyces</i>      | 0.2349385         | 0.0009957278     | 0.0003088818     |
| <i>Alloprevotella</i>   | 0.008206548       | 0.016134         | 0.6422           |
| <i>Atopobium</i>        | 0.02341573        | 0.0004587798     | 0.007678531      |
| <i>Bacteroides</i>      | 0.9101219         | 0.5037377        | 0.5827475        |
| <i>Campylobacter</i>    | 0.02676588        | 0.02904887       | 0.7960784        |
| <i>Capnocytophaga</i>   | 0.006395767       | 0.2188402        | 0.2481401        |
| <i>Dolosigranulum</i>   | 0.000001640764    | 0.00000001263839 | 0.1644374        |
| <i>Fusobacterium</i>    | 0.01536983        | 0.002327948      | 0.2626943        |
| <i>Gemella</i>          | 0.2613953         | 0.0008773248     | 0.05959559       |
| <i>Glaesserella</i>     | 0.08602148        | 0.3379769        | 0.4714011        |
| <i>Komagataeibacter</i> | 0.713456          | 0.2517327        | 0.4948042        |
| <i>Kytococcus</i>       | 0.001744615       | 0.00000998748    | 0.009237343      |
| <i>Lautropia</i>        | 0.005378676       | 0.06210935       | 0.3961506        |
| <i>Mycoplasma</i>       | 0.0006483429      | 0.0004287703     | 0.7688339        |
| <i>Neisseria</i>        | 0.05095998        | 0.009386655      | 0.1999062        |
| <i>Parabacteroides</i>  | 0.03678525        | 0.2889619        | 0.3276759        |
| <i>Pluralibacter</i>    | NA                | 0.2887304        | 0.2887304        |
| <i>Porphyromonas</i>    | 0.0009080425      | 0.06887038       | 0.2698042        |
| <i>Prevotella</i>       | 0.00001108758     | 0.001887111      | 0.6486412        |

|                         |              |               |                |
|-------------------------|--------------|---------------|----------------|
| <i>Primorskyibacter</i> | 0.428352     | 0.002437779   | 0.000002316134 |
| <i>Rothia</i>           | 0.1070962    | 0.00001601009 | 0.00003950644  |
| <i>Schaalia</i>         | 0.00594972   | 0.00003496756 | 0.0003304191   |
| <i>Selenomonas</i>      | 0.004095867  | 0.04803979    | 0.4454585      |
| <i>Tannerella</i>       | 0.0003585079 | 0.003201938   | 0.9762069      |
| <i>Treponema</i>        | 0.0007500733 | 0.1022729     | 0.09728571     |
| <i>Veillonella</i>      | 0.9336206    | 0.1158651     | 0.01330685     |

**Table S2.** The *P*-values of fungi among HCG, PDG and CG.

| <b>Genera</b>         | <b>HCG VS PDG</b> | <b>HCG VS CG</b> | <b>PDG VS CG</b> |
|-----------------------|-------------------|------------------|------------------|
| <i>Alternaria</i>     | 0.7559474         | 0.6071313        | 0.8426529        |
| <i>Aspergillus</i>    | 0.02015608        | 0.003807618      | 0.6063145        |
| <i>Botrytis</i>       | 0.0007215124      | 0.00003254014    | 0.4486583        |
| <i>Clavispora</i>     | 0.002421023       | 0.1218477        | 0.07537623       |
| <i>Colletotrichum</i> | 0.2475572         | 0.002099082      | 0.06996017       |
| <i>Daldinia</i>       | 0.1177105         | 0.1002397        | 1                |
| <i>Endocarpon</i>     | 0.00004011484     | 0.0000001235903  | 0.1312304        |
| <i>Fusarium</i>       | 0.05465945        | 0.249943         | 0.3765705        |
| <i>Komagataella</i>   | 0.2720938         | 0.01645642       | 0.0006122702     |
| <i>Kwoniella</i>      | 0.3009716         | 0.7583863        | 0.4755281        |
| <i>Lobosporangium</i> | 0.001016808       | 0.0005776653     | 0.9751362        |

---

|                            |              |                 |               |
|----------------------------|--------------|-----------------|---------------|
| <i>Malassezia</i>          | 0.2967947    | 0.3963373       | 0.07579827    |
| <i>Marssonina</i>          | 0.001642283  | 0.00003318598   | 0.2702668     |
| <i>Melampsora</i>          | 0.2351563    | 0.3127587       | 0.8549763     |
| <i>Pestalotiopsis</i>      | 0.0001137928 | 0.00007326745   | 0.8398866     |
| <i>Phaeoacremonium</i>     | 0.0007765106 | 0.000005760552  | 0.3704947     |
| <i>Pseudogymnoascus</i>    | 0.006313764  | 0.02274122      | 0.6108436     |
| <i>Saccharomyces</i>       | 0.8860856    | 0.4767524       | 0.4467737     |
| <i>Schizosaccharomyces</i> | 0.02717674   | 0.01229319      | 0.6723804     |
| <i>Sphaerulina</i>         | 0.001100909  | 0.01408942      | 0.3053589     |
| <i>Spizellomyces</i>       | 0.3277167    | 0.4587604       | 0.1271456     |
| <i>Sugiyamaella</i>        | 0.004080605  | 0.04008294      | 0.4587604     |
| <i>Trametes</i>            | 0.1474609    | 0.001213871     | 0.00005219259 |
| <i>Tremella</i>            | 0.01015853   | 0.1189486       | 0.2996268     |
| <i>Verruconis</i>          | 0.01216164   | 0.0000000083559 | 0.00006941079 |
| <i>Yarrowia</i>            | 0.02344477   | 0.0000003240681 | 0.001809771   |

---

**Table S3.** The *P*-values of viruses among HCG, PDG and CG.

| Genera                          | HCG VS PDG  | HCG VS CG | PDG VS CG   |
|---------------------------------|-------------|-----------|-------------|
| <i>Human alphaherpesvirus 1</i> | NA          | 0.2887304 | 0.2887304   |
| <i>Human betaherpesvirus 7</i>  | 0.327716665 | NA        | 0.368403472 |
| <i>Human gammaherpesvirus 4</i> | 0.314552254 | 0.1204879 | 0.544812611 |
| <i>Porcine type-C oncovirus</i> | 0.327716665 | NA        | 0.368403472 |
| <i>Rhinovirus A</i>             | 0.327716665 | 0.3684035 | NA          |
| <i>Rhinovirus C</i>             | 0.327716665 | 0.3684035 | NA          |
| <i>SARS-CoV-2</i>               | 0.001753917 | NA        | 0.003776169 |

**Table S4.** The read counts of the 140 involved sample.

| Samples | total_clean_reads | human_map_reads | unmap.reads |
|---------|-------------------|-----------------|-------------|
| PG1     | 20,311,598        | 159,805         | 20,151,793  |
| PG10    | 18,263,705        | 9,632,479       | 8,631,226   |
| PG11    | 21,628,608        | 483,489         | 21,145,119  |
| PG12    | 15,184,163        | 8,162,043       | 7,022,120   |
| PG13    | 20,723,215        | 1,560,350       | 19,162,865  |
| PG14    | 21,600,723        | 2,781,588       | 18,819,135  |
| PG15    | 23,431,187        | 19,808,427      | 3,622,760   |
| PG16    | 13,604,539        | 11,443,621      | 2,160,918   |
| PG17    | 18,599,509        | 17,367,801      | 1,231,708   |
| PG18    | 19,574,130        | 8,076,837       | 11,497,293  |
| PG19    | 17,766,250        | 17,092,809      | 673,441     |
| PG2     | 17,347,841        | 1,787,154       | 15,560,687  |
| PG20    | 16,884,651        | 11,614,877      | 5,269,774   |
| PG21    | 16,429,065        | 13,898,476      | 2,530,589   |
| PG22    | 22,463,019        | 18,904,535      | 3,558,484   |
| PG23    | 43,239,914        | 23,267,071      | 19,972,843  |
| PG24    | 25,814,754        | 18,458,003      | 7,356,751   |
| PG25    | 38,150,343        | 8,724,193       | 29,426,150  |
| PG26    | 25,005,348        | 1,819,497       | 23,185,851  |
| PG27    | 17,433,507        | 6,602,780       | 10,830,727  |
| PG28    | 17,357,136        | 12,990,649      | 4,366,487   |

|      |            |            |            |
|------|------------|------------|------------|
| PG29 | 15,432,730 | 8,271,801  | 7,160,929  |
| PG3  | 16,092,928 | 1,511,923  | 14,581,005 |
| PG30 | 19,819,669 | 14,792,613 | 5,027,056  |
| PG31 | 17,427,264 | 12,810,666 | 4,616,598  |
| PG32 | 19,883,209 | 1,803,954  | 18,079,255 |
| PG33 | 13,934,611 | 9,589,474  | 4,345,137  |
| PG34 | 17,405,966 | 1,028,588  | 16,377,378 |
| PG35 | 21,259,229 | 4,067,677  | 17,191,552 |
| PG36 | 12,913,770 | 3,498,684  | 9,415,086  |
| PG37 | 18,602,635 | 2,934      | 18,599,701 |
| PG38 | 21,629,939 | 5,802,530  | 15,827,409 |
| PG39 | 18,816,035 | 2,819,379  | 15,996,656 |
| PG4  | 17,646,712 | 159,470    | 17,487,242 |
| PG40 | 16,626,344 | 6,774,929  | 9,851,415  |
| PG41 | 19,134,947 | 14,928,081 | 4,206,866  |
| PG42 | 18,523,131 | 462,098    | 18,061,033 |
| PG43 | 18,941,024 | 1,314,201  | 17,626,823 |
| PG44 | 20,144,153 | 18,294,540 | 1,849,613  |
| PG45 | 17,788,964 | 15,929,747 | 1,859,217  |
| PG46 | 16,274,390 | 9,540,829  | 6,733,561  |
| PG47 | 16,341,213 | 15,263,252 | 1,077,961  |
| PG5  | 12,578,301 | 2,643,753  | 9,934,548  |
| PG6  | 19,144,344 | 1,974,298  | 17,170,046 |
| PG7  | 20,487,328 | 1,414,652  | 19,072,676 |
| PG8  | 13,918,568 | 575,946    | 13,342,622 |
| PG9  | 17,240,982 | 3,311,853  | 13,929,129 |
| CG18 | 31,544,214 | 26,236,498 | 5,307,716  |
| CG12 | 26,503,858 | 24,422,041 | 2,081,817  |
| CG28 | 22,756,203 | 17,231,721 | 5,524,482  |
| CG43 | 31,845,280 | 28,640,172 | 3,205,108  |
| CG16 | 31,469,900 | 21,576,462 | 9,893,438  |
| CG37 | 24,466,904 | 17,754,987 | 6,711,917  |
| CG10 | 28,900,665 | 12,389,926 | 16,510,739 |
| CG27 | 18,721,455 | 14,901,068 | 3,820,387  |
| CG33 | 22,089,222 | 2,179,317  | 19,909,905 |
| CG44 | 19,157,780 | 17,442,794 | 1,714,986  |
| CG23 | 14,350,242 | 13,375,692 | 974,550    |
| CG24 | 14,889,680 | 13,826,313 | 1,063,367  |
| CG45 | 15,738,371 | 12,642,136 | 3,096,235  |
| CG46 | 16,225,280 | 7,223,812  | 9,001,468  |
| CG47 | 20,378,645 | 10,857,522 | 9,521,123  |
| CG31 | 30,053,703 | 13,431,205 | 16,622,498 |
| CG30 | 23,827,273 | 5,229,604  | 18,597,669 |
| CG39 | 27,583,961 | 26,398,878 | 1,185,083  |

|      |            |            |            |
|------|------------|------------|------------|
| CG15 | 14,712,454 | 13,553,122 | 1,159,332  |
| CG8  | 22,013,073 | 7,530,061  | 14,483,012 |
| CG5  | 13,686,417 | 7,480,451  | 6,205,966  |
| CG36 | 13,776,261 | 8,375,037  | 5,401,224  |
| CG7  | 17,440,262 | 9,712,215  | 7,728,047  |
| CG25 | 18,719,871 | 17,421,937 | 1,297,934  |
| CG6  | 15,421,323 | 8,697,106  | 6,724,217  |
| CG3  | 13,798,220 | 4,658,142  | 9,140,078  |
| CG4  | 19,644,461 | 18,940,202 | 704,259    |
| CG32 | 17,102,518 | 16,140,507 | 962,011    |
| CG20 | 13,731,109 | 5,300,771  | 8,430,338  |
| CG38 | 14,401,946 | 8,876,477  | 5,525,469  |
| CG40 | 22,047,106 | 11,217,765 | 10,829,341 |
| CG19 | 13,690,527 | 11,436,403 | 2,254,124  |
| CG29 | 21,139,680 | 10,381,874 | 10,757,806 |
| CG21 | 15,931,002 | 10,665,618 | 5,265,384  |
| CG41 | 22,681,132 | 14,973,990 | 7,707,142  |
| CG22 | 20,977,825 | 19,530,666 | 1,447,159  |
| CG1  | 24,278,045 | 19,582,545 | 4,695,500  |
| CG14 | 24,595,369 | 3,873,114  | 20,722,255 |
| CG26 | 21,545,134 | 12,126,495 | 9,418,639  |
| CG2  | 20,157,231 | 5,466,117  | 14,691,114 |
| CG42 | 23,314,043 | 6,251,348  | 17,062,695 |
| CG11 | 21,007,204 | 5,925,914  | 15,081,290 |
| CG35 | 19,994,461 | 5,209,568  | 14,784,893 |
| CG9  | 15,207,992 | 9,436,962  | 5,771,030  |
| CG34 | 24,058,154 | 5,066,329  | 18,991,825 |
| CG17 | 22,642,505 | 8,251,224  | 14,391,281 |
| CG13 | 25,981,702 | 6,096,194  | 19,885,508 |
| HG37 | 22,568,425 | 10,514,417 | 12,054,008 |
| HG29 | 15,571,075 | 11,005,045 | 4,566,030  |
| HG18 | 15,053,300 | 4,852,118  | 10,201,182 |
| HG14 | 21,761,146 | 3,886,526  | 17,874,620 |
| HG38 | 18,744,799 | 944,950    | 17,799,849 |
| HG15 | 24,415,426 | 855,629    | 23,559,797 |
| HG39 | 27,874,654 | 166,004    | 27,708,650 |
| HG40 | 16,142,032 | 967,542    | 15,174,490 |
| HG16 | 29,618,320 | 386,206    | 29,232,114 |
| HG17 | 30,505,105 | 994,336    | 29,510,769 |
| HG9  | 27,614,671 | 921,278    | 26,693,393 |
| HG28 | 15,792,156 | 2,588,294  | 13,203,862 |
| HG34 | 19,511,833 | 3,340,595  | 16,171,238 |
| HG10 | 28,941,490 | 1,318,476  | 27,623,014 |
| HG30 | 37,757,928 | 10,863,240 | 26,894,688 |

|      |            |            |            |
|------|------------|------------|------------|
| HG31 | 17,835,806 | 1,454,697  | 16,381,109 |
| HG32 | 33,195,820 | 1,386,738  | 31,809,082 |
| HG33 | 31,171,477 | 1,984,462  | 29,187,015 |
| HG11 | 26,425,763 | 23,844,643 | 2,581,120  |
| HG12 | 37,492,260 | 13,262,380 | 24,229,880 |
| HG19 | 27,171,105 | 10,409,816 | 16,761,289 |
| HG35 | 31,773,463 | 17,712,967 | 14,060,496 |
| HG36 | 26,347,749 | 9,959,578  | 16,388,171 |
| HG1  | 30,853,958 | 2,294,084  | 28,559,874 |
| HG13 | 33,642,727 | 4,354,221  | 29,288,506 |
| HG21 | 32,751,157 | 418,646    | 32,332,511 |
| HG2  | 29,511,669 | 28,104,541 | 1,407,128  |
| HG22 | 30,363,568 | 28,701,910 | 1,661,658  |
| HG23 | 30,732,808 | 29,075,021 | 1,657,787  |
| HG24 | 25,127,801 | 24,019,024 | 1,108,777  |
| HG25 | 31,236,215 | 15,605,751 | 15,630,464 |
| HG3  | 30,512,358 | 29,439,121 | 1,073,237  |
| HG26 | 20,053,307 | 19,332,580 | 720,727    |
| HG27 | 27,793,819 | 26,949,199 | 844,620    |
| HG4  | 24,945,061 | 19,397,194 | 5,547,867  |
| HG5  | 30,868,027 | 29,772,354 | 1,095,673  |
| HG6  | 28,170,309 | 26,885,484 | 1,284,825  |
| HG7  | 29,165,798 | 28,157,615 | 1,008,183  |
| HG8  | 31,675,674 | 30,562,835 | 1,112,839  |
| HG20 | 30,505,239 | 29,352,412 | 1,152,827  |
| NC1  | 645,649    | 99,968     | 545,681    |
| NC2  | 6,409,819  | 912,474    | 5,497,345  |
| NC3  | 14,421,389 | 5,089,277  | 9,332,112  |
| NC4  | 11,764,432 | 1,543,727  | 10,220,705 |
| NC5  | 650,867    | 114,628    | 536,239    |
| NC6  | 27,200,744 | 1,179,993  | 26,020,751 |

**Table S5. The total number/abundance of the 534 genera of bacteria.**

**Table S6. Statistical analysis of antibiotic resistance gene abundance in figure 6a.**

| Antibiotic resistance genes | P-value (HCG VS PDG) |
|-----------------------------|----------------------|
| arlR                        | 0.129372788          |
| CpxR                        | 0.04181358           |
| gyrB                        | 0.669322139          |
| smeR                        | 0.050672372          |
| PIB                         | 0.000724031          |
| evgA                        | 0.300596598          |



|          |             |
|----------|-------------|
| gyrA     | 0.655616773 |
| rpld     | 0.724091892 |
| ErmT     | 0.065789612 |
| Erm(48)  | 0.065789612 |
| Erm(44)v | 0.065789612 |
| ErmG     | 0.065789612 |
| ErmC     | 0.065789612 |
| ErmY     | 0.065789612 |
| Erm(33)  | 0.162315334 |
| Erm(43)  | 0.065789612 |
| ErmA     | 0.162315334 |
| ErmB     | 0.065789612 |
| erm(45)  | 0.065789612 |
| Erm(47)  | 0.065789612 |
| PhoP     | 0.201514367 |
| rpoB     | 0.167354089 |
| mtrA     | 0.144795591 |
| parY     | 0.617595665 |
| kdpE     | 0.097127446 |
| rpsL     | 0.993132404 |
| dfrG     | 0.45937984  |
| dfrK     | 0.068785742 |
| dfrD     | 0.112476821 |
| dfrC     | 0.416762539 |
| dfrE     | 0.538803593 |
| dfrA3    | 0.509810087 |
| EF-Tu    | 0.118586518 |
| parE     | 0.750404304 |
| PtsI     | 0.209966759 |
| murA     | 0.283632654 |
| UhpA     | 0.573428205 |
| fusA     | 0.129711697 |
| fusE     | 0.972454498 |
| vanRG    | 0.063015425 |
| vanRC    | 0.098618774 |
| vanRM    | 0.07744892  |
| vanRD    | 0.076992291 |
| vanRL    | 0.072737588 |
| vanRI    | 0.158039428 |
| vanRO    | 0.65186859  |
| vanRB    | 0.083103895 |
| vanRF    | 0.047298832 |
| vanRA    | 0.065867504 |
| vanRN    | 0.351865584 |

|            |             |
|------------|-------------|
| vanRE      | 0.091289849 |
| liaR       | 0.513868514 |
| basR       | 0.117455578 |
| rpsA       | 0.005455287 |
| tetB(P)    | 0.04991975  |
| tetT       | 0.891616885 |
| tet32      | 0.298106066 |
| tet(44)    | 0.406354145 |
| tetO       | 0.901994778 |
| tetW       | 0.019900335 |
| tetS       | 0.972970733 |
| otr(A)     | 0.501865286 |
| tet(W/N/W) | 0.008387276 |
| rpsJ       | 0.173034568 |
| tetM       | 0.959515952 |
| tet36      | 0.028115484 |
| fabG       | 0.402633121 |

**Table S7. Statistical analysis of antibiotic resistance gene abundance in figure 6b.**

| Antibiotic resistance genes | P-value (PDG VS CG) |
|-----------------------------|---------------------|
| arlR                        | 0.00051016          |
| CpxR                        | 0.000504217         |
| smeR                        | 0.000158128         |
| PIB                         | 0.290223987         |
| rpId                        | 0.371881498         |
| ErmT                        | 1.10E-05            |
| Erm(48)                     | 1.10E-05            |
| Erm(44)v                    | 1.10E-05            |
| ErmG                        | 1.10E-05            |
| ErmC                        | 1.10E-05            |
| ErmY                        | 1.10E-05            |
| Erm(33)                     | 0.000104181         |
| Erm(43)                     | 1.10E-05            |
| ErmA                        | 0.000104181         |
| ErmB                        | 1.10E-05            |
| erm(45)                     | 1.10E-05            |
| Erm(47)                     | 1.10E-05            |
| PhoP                        | 4.12E-05            |
| mtrA                        | 5.73E-05            |
| kdpE                        | 0.01088132          |
| rpsL                        | 0.893311364         |
| dfrK                        | 0.00451831          |

|            |             |
|------------|-------------|
| dfrD       | 0.015530789 |
| EF-Tu      | 0.670590848 |
| PtsI       | 0.003391732 |
| murA       | 0.02720898  |
| fusA       | 0.289998824 |
| fusE       | 0.593134459 |
| vanRG      | 0.005407661 |
| vanRC      | 0.000118639 |
| vanRM      | 0.006901466 |
| vanRD      | 0.005015205 |
| vanRL      | 0.000114582 |
| vanRI      | 0.00013626  |
| vanRB      | 0.005544515 |
| vanRF      | 0.005143066 |
| vanRA      | 0.004417995 |
| vanRN      | 0.001186038 |
| vanRE      | 0.006433299 |
| liaR       | 0.050272122 |
| basR       | 0.0156464   |
| tetB(P)    | 0.048860142 |
| tetT       | 0.006400432 |
| tet32      | 0.021448338 |
| tet(44)    | 0.099692714 |
| tetO       | 0.067659668 |
| tetW       | 0.029046952 |
| tetS       | 0.000468281 |
| otr(A)     | 0.834523924 |
| tet(W/N/W) | 0.015931072 |
| rpsJ       | 0.282888118 |
| tetM       | 0.00126816  |
| tet36      | 0.005943026 |
| fabG       | 0.764754518 |
